# Supplementary material for: Identifying health policy and systems research priorities on multisectoral collaboration for health in low-income and middle-income countries
Source: PubMed Central journal article supplement (PMC6195136; doi:10.1136/bmjgh-2018-000970), 2018-10-10
Supplement: bmjgh-2018-000970supp005.pdf [file bmjgh-2018-000970supp005.pdf]

## Appendix 5: Policymaker consultation respondents

Policymaker respondents represented a variety of different types of institutions, including: state government; office of the prime minister; ministry of planning; ministry of health; department of health; department of environmental affairs; department of public service and administration; national council for coordination of social policies; public health agencies; various bilateral and multilateral development organizations; various private or not-for-profit technical implementers of development aid; and others.

Positions included: minister for health; principal secretary for health; health commissioner and assistant commissioner; director-general and deputy director-general for health; directors of various departments; secretaries and assistant secretaries; special advisors; senior planning officers; senior policy analysts; organizational presidents and vice presidents; technical leads; project coordinators; and others.

Of the 54 respondents included in IDIs, 15 (28%) were female and 39 (72%) were male. Details on the gender of focus group participants were not recorded.

### IDI respondent summary by geographic region

| WHO Region                   | Total No. Respondents Identified & Invited | Total No. Respondents Included | Total No. Respondents Discussing MSC | Interview Language(s)   |
|------------------------------|--------------------------------------------|--------------------------------|--------------------------------------|-------------------------|
| Africa Region                | 30                                         | 12                             | 10                                   | English                 |
| Region of the Americas       | 11                                         | 10                             | 10                                   | English, Spanish        |
| South-East Region            | 17                                         | 14                             | 14                                   | English                 |
| European Region              | 0                                          | 0                              | 0                                    | NA                      |
| Eastern Mediterranean Region | 5                                          | 4                              | 3                                    | English, Arabic, French |
| Western Pacific Region       | 15                                         | 8                              | 7                                    | English, Mandarin       |
| Multi/Bi-lateral Org/NGOs    | 7                                          | 6                              | 4                                    | English                 |
| <b>Total</b>                 | <b>85</b>                                  | <b>54</b>                      | <b>48</b>                            |                         |

### FGD respondent summary

| Focus Group Country | No. of Respondents Invited | Total No. Respondents Included | Focus Group Discussion Language |
|---------------------|----------------------------|--------------------------------|---------------------------------|
| Bahrain             | 16                         | 10                             | English                         |
| Jordan              | 17                         | 17                             | Arabic                          |
| <b>Total</b>        | <b>33</b>                  | <b>27</b>                      |                                 |
