# Supplementary material for: Identifying health policy and systems research priorities on multisectoral collaboration for health in low-income and middle-income countries
Source: PubMed Central journal article supplement (PMC6195136; doi:10.1136/bmjgh-2018-000970), 2018-10-10
Supplement: bmjgh-2018-000970supp006.pdf [file bmjgh-2018-000970supp006.pdf]

## Appendix 6: Top thirty ranked research questions on multi-sectoral collaboration for health

| Rank | Research Question                                                                                                                                                                                                                                                                              | Unweighted final score |
|------|------------------------------------------------------------------------------------------------------------------------------------------------------------------------------------------------------------------------------------------------------------------------------------------------|------------------------|
| 1    | Which strategies and mechanisms are effective in supporting the implementation of multisectoral collaborations for health? (e.g., enabling legislation, policy mandate, decentralized control, accountability and incentive mechanisms, dedicated resources, training/skill development, etc.) | 67.9%                  |
| 2    | What factors are necessary for sustaining multisectoral collaborations over time?                                                                                                                                                                                                              | 63.0%                  |
| 3    | How does the use of evidence differ across different sectors and how can we make health evidence more accessible and actionable in other sectors?                                                                                                                                              | 62.7%                  |
| 3    | What is the role of community-based partnerships and initiatives in driving multi-sectoral collaborations for health?                                                                                                                                                                          | 62.7%                  |
| 5    | What types of leadership, partnership, and governance structures and processes are most effective for multisectoral collaboration?                                                                                                                                                             | 60.0%                  |
| 6    | What are the key challenges to implementing multisectoral programs and interventions to address health issues (e.g., food security, NCDs, HIV/AIDS)?                                                                                                                                           | 59.7%                  |
| 7    | How do contextual factors such as institutional arrangements, governance arrangements, democratic values, partnership experiences affect the success (or failure) of multisectoral collaborations?                                                                                             | 53.0%                  |
| 8    | How can we best improve the capacity of stakeholders involved in multisectoral action for health (such as health advocates, or health practitioners), to engage in and also promote multisectoral initiatives?                                                                                 | 52.6%                  |
| 9    | Which study designs and methods are best suited to understanding multisectoral collaborations, their governance, functioning and outcomes?                                                                                                                                                     | 51.8%                  |
| 10   | How do multisectoral collaborations affect health equity and social determinants of health?                                                                                                                                                                                                    | 50.9%                  |
| 10   | How do interventions that target non-health SDGs affect health outcomes?                                                                                                                                                                                                                       | 50.9%                  |
| 12   | What are the drivers that bring actors together to form multi-sectoral partnerships (e.g., political context, organizational objectives, other motivating factors, etc.)?                                                                                                                      | 49.2%                  |
| 13   | For which health issues are multi-sectoral partnerships more effective than other strategies?                                                                                                                                                                                                  | 48.5%                  |
| 14   | What is the role of non-health decision makers in shaping the public health policy and research agenda?                                                                                                                                                                                        | 48.3%                  |
| 15   | How can indicators and information systems be harmonized across partners in a multisectoral collaboration?                                                                                                                                                                                     | 46.0%                  |
| 16   | What is the impact of good health or health services on the ability of other sectors (outside of health) to achieve their Sustainable Development Goals?                                                                                                                                       | 45.1%                  |
| 17   | How do multisectoral initiatives affect vulnerable and marginalized populations?                                                                                                                                                                                                               | 44.8%                  |
| 18   | Which conceptual and theoretical frameworks can further contribute to understanding multisectoral issues?                                                                                                                                                                                      | 44.4%                  |
| 19   | What role can policy champions play in driving multi-sectoral collaborations and how can this engagement be supported?                                                                                                                                                                         | 42.9%                  |
| 20   | What is the additional impact of multisectoral collaboration on health and health equity outcomes as compared to single sector approaches?                                                                                                                                                     | 40.0%                  |
| 21   | What are the resource costs of initiating and maintaining multi-sectoral collaborations (e.g., as opposed to single-sector interventions)?                                                                                                                                                     | 39.6%                  |
| 22   | What can be done in formal multi-sector partnerships to increase the commitment of members through incentives and other means?                                                                                                                                                                 | 38.9%                  |
| 23   | How can initiators of multi-sectoral collaborations determine the appropriate scope of the partnership (e.g., number of partners to include, level of involvement of each)?                                                                                                                    | 38.5%                  |
| 24   | How does multisectoral collaboration differ from the local to the national level (e.g., in terms of challenges, processes)?                                                                                                                                                                    | 36.4%                  |
| 25   | What are the main differences between multi-sectoral collaborations involving private sector partners or multi-sectoral collaborations involving public sector only?                                                                                                                           | 33.3%                  |

| Rank | Research Question                                                                                                                                     | Unweighted final score |
|------|-------------------------------------------------------------------------------------------------------------------------------------------------------|------------------------|
| 25   | Is there a set of core activities that facilitate multi-sectoral collaborations across contexts, and if so, what are they?                            | 33.3%                  |
| 27   | What is the role of the Ministry of Health in multi-sectoral collaborations vis-À-vis other ministries and how does this vary across topics/contexts? | 27.3%                  |
| 28   | How do clients or beneficiaries experience effective (or less effective) multisectoral initiatives?                                                   | 25.0%                  |
| 29   | What are the unintended consequences (positive or negative) of multi-sectoral partnerships?                                                           | 20.0%                  |
| 30   | How can locally initiated multisectoral collaborations be scaled up?                                                                                  | 18.2%                  |
